# Supplementary material
Source: PubMed Central journal article supplement (PMC6035751)
Supplement: NIHMS974167-supplement-SI.pdf [file NIHMS974167-supplement-SI.pdf]

## SUPPORTING INFORMATION

### Biodegradable STING agonist nanoparticles for enhanced cancer immunotherapy

David R. Wilson<sup>1-3,†</sup>, Rupashree Sen<sup>4,†</sup>, Joel C. Sunshine<sup>1-3</sup>, Drew M. Pardoll<sup>4-6</sup>, Jordan J. Green<sup>1-10,Ψ</sup>, Young J. Kim<sup>11,Ψ</sup>

<sup>1</sup>Biomedical Engineering, <sup>2</sup>Translational Tissue Engineering Center, <sup>3</sup>Institute for Nanobiotechnology, <sup>4</sup>Bloomberg-Kimmel Institute for Cancer Immunotherapy, <sup>5</sup>Sidney Kimmel Comprehensive Cancer Center, <sup>6</sup>Oncology, <sup>7</sup>Materials Science and Engineering, <sup>8</sup>Chemical and Biomolecular Engineering, <sup>9</sup>Ophthalmology, <sup>10</sup>Neurosurgery, Johns Hopkins University School of Medicine, Baltimore, Maryland, United States

<sup>11</sup>Otolaryngology / Head & Neck Surgery, Vanderbilt-Ingram Cancer Center, Vanderbilt University Medical Center, Nashville, Tennessee, USA.

† These authors contributed equally to this work.

Ψ Corresponding authors

Supplementary Table 1: Monomer sources

| Monomer | Chemical Name                                    | CAS number                                                    | Supplier                       | Product # | MW     |
|---------|--------------------------------------------------|---------------------------------------------------------------|--------------------------------|-----------|--------|
| B4      | 1,4-Butanediol diacrylate                        | 1070-70-8                                                     | Alfa Aesar                     | 32780     | 198.22 |
| B5      | 1,5-Pentanediol diacrylate                       | 36840-85-4                                                    | Monomer-Polymer and Dajac Labs | 9281      | 212.24 |
| BR6     | 2,2-disulfanediylbis(ethane-2,1-diyl) diacrylate | Synthesized according to Kozielski <i>et al.</i> <sup>1</sup> |                                |           | 262.34 |
| S3      | 3-amino-1-propanol                               | 156-87-6                                                      | Alfa Aesar                     | B23041    | 75.11  |
| S4      | 4-amino-1-butanol                                | 13325-10-05                                                   | Alfa Aesar                     | A12680    | 89.14  |
| E6      | 2-(3-Aminopropylamino)ethanol                    | 4461-39-6                                                     | Sigma Aldrich                  | 9293      | 118.18 |
| E7      | 1-(3-Aminopropyl)-4-methylpiperazine             | 4572-031                                                      | Alfa Aesar                     | L04876    | 157.26 |

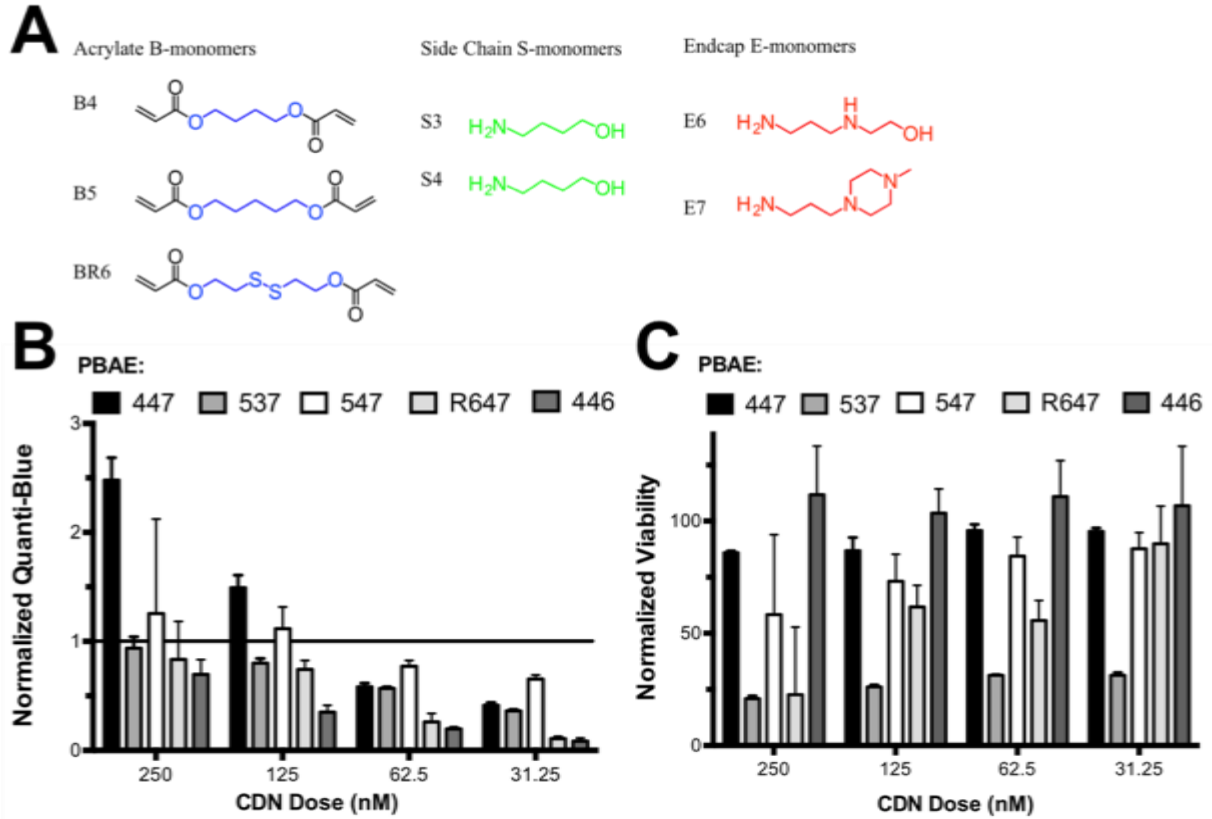

**Supplementary Figure 1.** (A) Monomers used for PBAE synthesis of structures tested for CDN delivery. PBAE structures were screened for their ability to (B) induce IRF3 response in THP1-Blue cells with delivery of RR-CDG with (C) minimal toxicity assessed by MTT cell metabolic activity assay. CDN dose was titrated, while PBAE dose remained constant between conditions at 15  $\mu\text{g}/\text{well}$ . PBAE 447 was selected as most effective at the doses tested. Bars show mean  $\pm$  SEM of three wells.

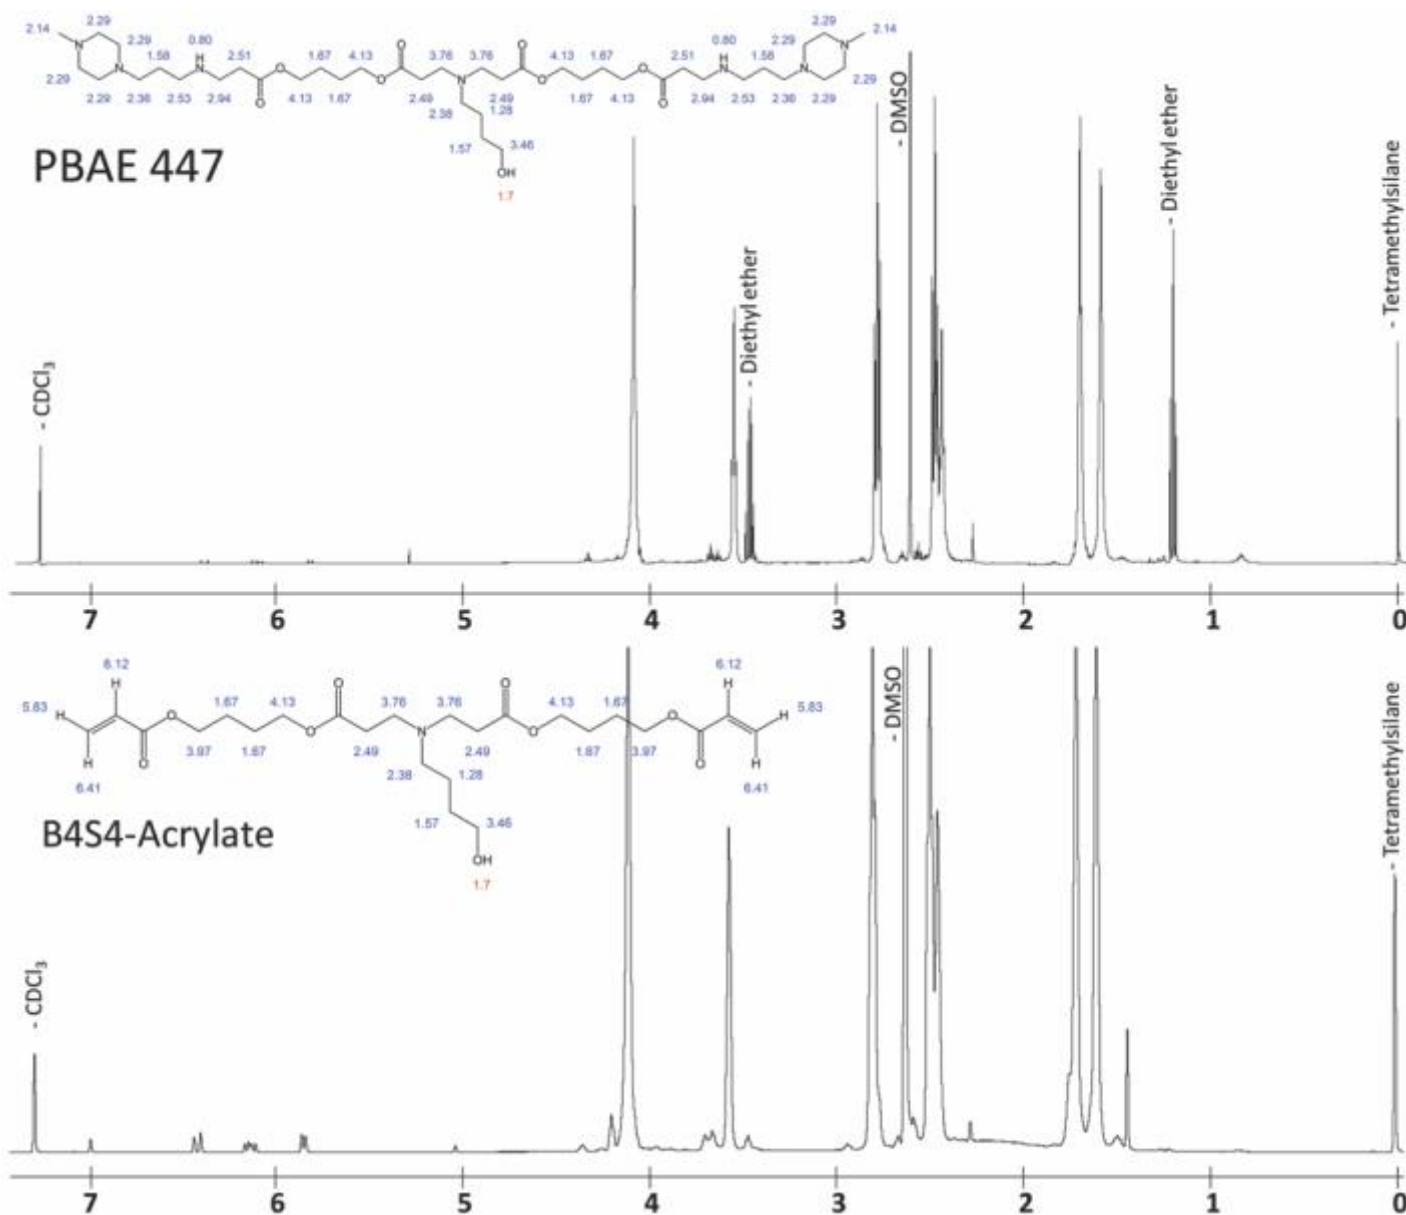

**Supplementary Figure 2.** PBAE polymer 447 and PBAE B4S4-Acrylate <sup>1</sup>H NMR in CDCl<sub>3</sub> was used to verify polymer structure and estimate M<sub>N</sub> to be 7 kDa. The mean repeat unit (MW = 287.36 g/mol) was determined to be 23 using the ratio of area between peaks for the endcap secondary amine hydrogen at 0.81 ppm and the hydrogens of the α-carbons of the B repeat units at 4.08 ppm. The peak and satellites at 2.60 ppm were due to DMSO contamination following isolation of the polymer from a DMSO stock.

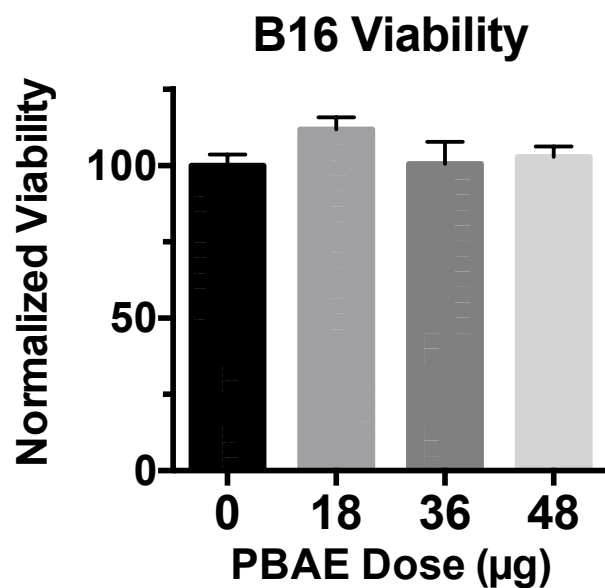

**Supplementary Figure 3. B16 viability following nanoparticle treatment.** The nanoparticle formulation of RR-CDG+PBAE 447 at a 500 w/w ratio was shown not to have any effect on B16 cells viability at doses almost 2.5x greater than those used with THP1-Blue cells for immunostimulatory studies.

1. Kozielski KL, SY Tzeng and JJ Green, **A bioreducible linear poly( $\beta$ -amino ester) for siRNA delivery.** *Chemical communications (Cambridge, England)*. 2013;49:5319-21
